# Supplementary material
Source: PubMed Central journal article supplement (PMC10026980)
Supplement: science.abi4506_sm.pdf [file science.abi4506_sm.pdf]

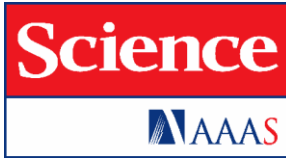

science.sciencemag.org/cgi/content/full/science.abi4506/DC1

## Supplementary Material for

### **Chimeric spike mRNA vaccines protect against Sarbecovirus challenge in mice**

David R. Martinez\*, Alexandra Schäfer, Sarah R. Leist, Gabriela De la Cruz, Ande West, Elena N. Atochina-Vasserman, Lisa C. Lindesmith, Norbert Pardi, Robert Parks, Maggie Barr, Dapeng Li, Boyd Yount, Kevin O. Saunders, Drew Weissman, Barton F. Haynes, Stephanie A. Montgomery, Ralph S. Baric\*

\*Corresponding author. Email: david.rafael.martinez@gmail.com (D.R.M.); rbaric@email.unc.edu (R.S.B.)

Published 22 June 2021 as *Science* First Release  
DOI: 10.1126/science.abi4506

#### **This PDF file includes:**

Materials and Methods  
Figs. S1 to S7  
Table S1  
Reference

**Other Supplementary Material for this manuscript includes the following:**  
(available at [science.sciencemag.org/content/science.abi4506/DC1](https://science.sciencemag.org/content/science.abi4506/DC1))

MDAR Reproducibility Checklist

1 **Supplementary materials.**

2

3 **Materials and Methods**

4

5 **Chimeric spike vaccine design and formulation**

6 Chimeric spike vaccines were designed with RBD and NTD swaps to increase coverage  
7 of epidemic (SARS-CoV), pandemic (SARS-CoV-2), and high-risk pre-emergent bat CoVs (bat  
8 SARS-like HKU3-1, and bat SARS-like RsSHC014). Chimeric and monovalent spike mRNA-  
9 LNP vaccines were designed based on SARS-CoV-2 spike (S) protein sequence (Wuhan-Hu-1,  
10 GenBank: MN908947.3), SARS-CoV (urbani GenBank: AY278741), bat SARS-like CoV  
11 HKU3-1 (GenBank: DQ022305), and Bat SARS-like RsSHC014 (GenBank: KC881005).  
12 Coding sequences of full-length SARS-CoV-2 furin knockout (RRAR furin cleavage site  
13 abolished between amino acids 682-685), the four chimeric spikes, and the norovirus capsid  
14 negative control were codon-optimized, synthesized and cloned into the mRNA production  
15 plasmid mRNAs were encapsulated with LNP (41). Briefly, mRNAs were transcribed to contain  
16 101 nucleotide-long poly(A) tails. mRNAs were modified with m<sup>1</sup>Ψ-5'-triphosphate (TriLink  
17 #N-1081) instead of UTP and the *in vitro* transcribed mRNAs capped using the trinucleotide  
18 cap1 analog, CleanCap (TriLink #N-7413). mRNA was purified by cellulose (Sigma-Aldrich #  
19 11363-250G) purification. All mRNAs were analyzed by agarose gel electrophoresis and were  
20 stored at -20°C. Cellulose-purified m<sup>1</sup>Ψ-containing RNAs were encapsulated in proprietary  
21 LNPs containing adjuvant (Acuitas) using a self-assembly process as previously described  
22 wherein an ethanolic lipid mixture of ionizable cationic lipid, phosphatidylcholine, cholesterol  
23 and polyethylene glycol-lipid was rapidly mixed with an aqueous solution containing mRNA at

24 acidic pH. The RNA-loaded particles were characterized and subsequently stored at -80°C at a  
25 concentration of 1 mg/ml. The mean hydrodynamic diameter of these mRNA-LNP was ~80 nm  
26 with a polydispersity index of 0.02-0.06 and an encapsulation efficiency of ~95%.

27

## 28 **Animals, immunizations, and challenge viruses**

29       Eleven-month-old female BALB/c mice were purchased from Envigo (#047) and were  
30 used for all experiments. The study was carried out in accordance with the recommendations for  
31 care and use of animals by the Office of Laboratory Animal Welfare (OLAW), National  
32 Institutes of Health and the Institutional Animal Care and Use Committee (IACUC) of  
33 University of North Carolina (UNC permit no. A-3410-01). mRNA-LNP vaccines were kept  
34 frozen until right before the vaccination. Mice were immunized with a total 1µg in the prime and  
35 boost. Briefly, chimeric vaccines were mixed at 1:1 ratio for a total of 1µg when more than one  
36 chimeric spike was used or 1µg of a single spike diluted in sterile 1XPBS in a 50µl volume and  
37 were given 25µl intramuscularly in each hind leg. Equal amounts of vaccines were used to more  
38 compare the vaccines groups head-to-head. Prime and boost immunizations were given three  
39 weeks apart. Three weeks post boost, mice were bled, sera was collected for analysis, and mice  
40 were moved into the BSL3 facility for challenge experiments. Animals were housed in groups of  
41 five and fed standard chow diets. Virus inoculations were performed under anesthesia and all  
42 efforts were made to minimize animal suffering. All mice were anesthetized and infected  
43 intranasally with  $1 \times 10^4$  PFU/ml of SARS-CoV MA15,  $1 \times 10^4$  PFU/ml of SARS-CoV-2 MA10,  
44  $1 \times 10^4$  PFU/ml RsSHC014,  $1 \times 10^4$  PFU/ml RsSHC014-MA15,  $1 \times 10^5$  PFU/ml WIV-1, and  $1 \times$   
45  $10^4$  PFU/ml SARS-CoV-2 B.1.351-MA10 which have been described previously (42, 43). Mice  
46 were weighted daily and monitored for signs of clinical disease. Each challenge virus challenge

47 experiment encompassed 50 mice with 10 mice per vaccine group to obtain statistical power.  
48 Mouse vaccinations and challenge experiments were independently repeated twice to ensure  
49 reproducibility.

50

### 51 **Measurement of mouse CoV spike binding antibodies by ELISA**

52 Mouse serum samples from pre-immunization (pre-prime), 2 weeks post prime (pre-  
53 boost), and 3 weeks post boost were tested. A binding ELISA panel that included SARS-CoV  
54 spike Protein Delta™, SARS-CoV-2 (2019-nCoV) spike Protein (S1+S2 ECD, His tag),  
55 MERS-CoV, Coronavirus spike S1+S2 (Baculovirus-Insect Cells, His), HKU1 (isolate N5) spike  
56 Protein (S1+S2 ECD, His Tag), OC43 spike Protein (S1+S2 ECD, His Tag), 229E spike Protein  
57 (S1+S2 ECD, His tag) Human coronavirus (HCoV-NL63) spike Protein (S1+S2 ECD, His Tag),  
58 Pangolin CoV\_GXP4L\_spikeEcto2P\_3C8HtS2/293F, bat CoV  
59 RsSHC014\_spikeEcto2P\_3C8HtS2/293F, RaTG13\_spikeEcto2P\_3C8HtS2/293F, and bat CoV  
60 HKU3-1 spike were tested. Indirect binding ELISAs were conducted in 384 well ELISA plates  
61 (Costar #3700) coated with 2µg/ml antigen in 0.1M sodium bicarbonate overnight at 4°C,  
62 washed and blocked with assay diluent (1XPBS containing 4% (w/v) whey protein/ 15% Normal  
63 Goat Serum/ 0.5% Tween-20/ 0.05% Sodium Azide). Serum samples were incubated for 60  
64 minutes in three-fold serial dilutions beginning at 1:30 followed by washing with PBS/0.1%  
65 Tween-20. HRP conjugated goat anti-mouse IgG secondary antibody (SouthernBiotech 1030-05)  
66 was diluted to 1:10,000 in assay diluent without azide, incubated at for 1 hour at room  
67 temperature, washed and detected with 20µl SureBlue Reserve (KPL 53-00-03) for 15 minutes.  
68 Reactions were stopped via the addition of 20µl HCL stop solution. Plates were read at 450nm.  
69 Area under the curve (AUC) measurements were determined from binding of serial dilutions.

70

71 **ACE2 blocking ELISAs.**

72           Plates were coated with 2 $\mu$ g/ml recombinant ACE2 protein, then washed and blocked  
73 with 3% BSA in PBS. While assay plates blocked, and sera was diluted 1:25 in 1%BSA/0.05%  
74 Tween-20. Then SARS-CoV-2 spike protein was mixed with equal volumes of each sample at a  
75 final spike concentration equal to the EC<sub>50</sub> at which it binds to ACE2. The mixture was allowed  
76 to incubate at room temperature for 1 hour. Blocked assay plates were washed, and the serum-  
77 spike mixture was added to the assay plates for a period of 1 hour at room temperature. Plates  
78 were washed and Strep-Tactin HRP, (IBA GmbH, Cat# 2-1502-001) was added at a dilution of  
79 1:5000 followed by TMB substrate. The extent to which antibodies were able to block the  
80 binding of spike protein to ACE2 was determined by comparing the OD of antibody samples at  
81 450nm to the OD of samples containing spike protein only with no antibody. The following  
82 formula was used to calculate percent blocking (100-(OD sample/OD of spike only) \*100).

83

84 **Measurement of neutralizing antibodies against live viruses**

85           Full-length SARS-CoV-2 Seattle, SARS-CoV-2 D614G, SARS-CoV-2 B.1.351, SARS-  
86 CoV-2 B.1.1.7, SARS-CoV-2 mink cluster 5, SARS-CoV, WIV-1, and RsSHC014 viruses were  
87 designed to express nanoluciferase (nLuc) and were recovered via reverse genetics. Virus titers  
88 were measured in Vero E6 USAMRIID cells, as defined by plaque forming units (PFU) per ml,  
89 in a 6-well plate format in quadruplicate biological replicates for accuracy. For the 96-well  
90 neutralization assay, Vero E6 USAMRID cells were plated at 20,000 cells per well the day prior  
91 in clear bottom black walled plates. Cells were inspected to ensure confluency on the day of  
92 assay. Serum samples were tested at a starting dilution of 1:20 and were serially diluted 3-fold up

93 to nine dilution spots. Serially diluted serum samples were mixed in equal volume with diluted  
94 virus. Antibody-virus and virus only mixtures were then incubated at 37°C with 5% CO<sub>2</sub> for one  
95 hour. Following incubation, serially diluted sera and virus only controls were added in duplicate  
96 to the cells at 75 PFU at 37°C with 5% CO<sub>2</sub>. After 24 hours, cells were lysed, and luciferase  
97 activity was measured via Nano-Glo Luciferase Assay System (Promega) according to the  
98 manufacturer specifications. Luminescence was measured by a Spectramax M3 plate reader  
99 (Molecular Devices, San Jose, CA). Virus neutralization titers were defined as the sample  
100 dilution at which a 50% reduction in RLU was observed relative to the average of the virus  
101 control wells.

102

### 103 **Eosinophilic lung infiltrates staining**

104 To detect eosinophils, chromogenic immunohistochemistry (IHC) was performed on paraffin-  
105 embedded lung tissues that were sectioned at 4 microns. Lung tissues from vaccine groups 1-5  
106 were analyzed for lung eosinophilic infiltration. N=8-10 lung tissues per group were analyzed.  
107 This IHC was carried out using the Leica Bond III Autostainer system. Slides were dewaxed in  
108 Bond Dewax solution (AR9222) and hydrated in Bond Wash solution (AR9590). Heat induced  
109 antigen retrieval was performed for 20 min at 100°C in Bond-Epitope Retrieval solution 2, pH-  
110 9.0 (AR9640). After pretreatment, slides were incubated with an Eosinophil Peroxidase antibody  
111 (PA5-62200, Invitrogen) at 1:1,000 for 1h followed with Novolink Polymer (RE7260-K)  
112 secondary. Antibody detection with 3,3'-diaminobenzidine (DAB) was performed using the  
113 Bond Intense R detection system (DS9263). Stained slides were dehydrated and coverslipped  
114 with Cytoseal 60 (8310-4, Thermo Fisher Scientific). Two positive controls (one with high and

115 another with low eosinophil reactivity) and a negative control (no primary antibody) were  
116 included in all staining runs.

117

### 118 **Lung pathology scoring**

119 Lung discoloration is the gross manifestation of various processes of acute lung damage,  
120 including congestion, edema, hyperemia, inflammation, and protein exudation. We used a  
121 macroscopic scoring scheme to visually score mouse lungs at the time of harvest. Acute lung  
122 injury was quantified via two separate lung pathology scoring scales: Matute-Bello and Diffuse  
123 Alveolar Damage (DAD) scoring systems. Analyses and scoring were performed by a board  
124 certified veterinary pathologist who was blinded to the treatment groups. Lung pathology slides  
125 were read and scored at 600X total magnification.

126 The lung injury scoring system used is from the American Thoracic Society (Matute-  
127 Bello) in order to help quantitate histological features of ALI observed in mouse models to relate  
128 this injury to human settings. In a blinded manner, three random fields of lung tissue were  
129 chosen and scored for the following: (A) neutrophils in the alveolar space (none = 0, 1–5 cells =  
130 1, > 5 cells = 2), (B) neutrophils in the interstitial septa (none = 0, 1–5 cells = 1, > 5 cells = 2),  
131 (C) hyaline membranes (none = 0, one membrane = 1, > 1 membrane = 2), (D) Proteinaceous  
132 debris in air spaces (none = 0, one instance = 1, > 1 instance = 2), (E) alveolar septal thickening  
133 (< 2x mock thickness = 0, 2–4x mock thickness = 1, > 4x mock thickness = 2). To obtain a lung  
134 injury score per field, A–E scores were put into the following formula  $\text{score} = [(20 \times A) + (14 \times$   
135  $B) + (7 \times C) + (7 \times D) + (2 \times E)]/100$ . This formula contains multipliers that assign varying  
136 levels of importance for each phenotype of the disease state. The scores for the three fields per  
137 mouse were averaged to obtain a final score ranging from 0 to and including 1. This lung

138 histology scoring scale measures diffuse alveolar damage (DAD) (cellular sloughing, necrosis,  
139 hyaline membranes, etc.). Similar to the implementation of the ATS histology scoring scale,  
140 three random fields of lung tissue were scored for the following in a blinded manner: 1= absence  
141 of cellular sloughing and necrosis, 2=Uncommon solitary cell sloughing and necrosis (1–2  
142 foci/field), 3=multifocal (3+foci) cellular sloughing and necrosis with uncommon septal wall  
143 hyalinization, or 4=multifocal (>75% of field) cellular sloughing and necrosis with common  
144 and/or prominent hyaline membranes. The scores for the three fields per mouse were averaged to  
145 get a final DAD score per mouse. The microscope images were generated using an Olympus  
146 Bx43 light microscope and CellSense Entry v3.1 software.

147

#### 148 **Measurement of lung cytokines**

149 Lung tissue was homogenized, spun down at 13,000g, and supernatant was used to  
150 measure lung cytokines using Mouse Cytokine 23-plex Assay (BioRad). Briefly, 50µl of lung  
151 homogenate supernatant was added to each well and the protocol was followed according to the  
152 manufacturer specifications. Plates were read using a MAGPIX multiplex reader (Luminex  
153 Corporation).

154

#### 155 **Biocontainment and biosafety**

156 Studies were approved by the UNC Institutional Biosafety Committee approved by  
157 animal and experimental protocols in the Baric laboratory. All work described here was  
158 performed with approved standard operating procedures for SARS-CoV-2 in a biosafety level 3  
159 (BSL-3) facility conforming to requirements recommended in the Microbiological and  
160 Biomedical Laboratories, by the U.S. Department of Health and Human Service, the U.S. Public



161 Health Service, and the U.S. Center for Disease Control and Prevention (CDC), and the National  
162 Institutes of Health (NIH).

163

164 **Statistics**

165 All statistical analyses were performed using GraphPad Prism 9. Statistical tests used in  
166 each figure are denoted in the corresponding figure legend.

167

168

169

170

171

172

173

174

175

176

177

178

179

180

181

182

183

184 **Figure S1. Chimeric and wild type spike Sarbecovirus constructs.**

185 (A) Mouse vaccination strategy using mRNA-LNPs: group 1 received chimeric spike 1, 2, 3, and  
186 4 as the prime and boost, group 2 received chimeric spike 1, 2 as the prime and chimeric spikes 3  
187 and 4 as the boost, group 3 received chimeric spike 4 as the prime and boost, group 4 received  
188 SARS-CoV-2 furin KO prime and boost, and group 5 received a norovirus capsid prime and  
189 boost. Different vaccine groups were separately challenged with 1) SARS-CoV MA15, 2)  
190 SARS-CoV-2 MA10, 3) RsSHC014 full-length virus, 4) RsSHC014-MA15, 5) WIV-1, and 6)  
191 SARS-CoV-2 B.1.351 MA10. (B) Protein expression of chimeric spikes, SARS-CoV-2 furin  
192 KO, and norovirus mRNA vaccines. The extra band between 100-150 kDa corresponds to S1.  
193 GAPDH was used as the loading control. (C) Nanoluciferase expression of RsSHC014/SARS-  
194 CoV-2 chimeric spike live viruses.

195

196 **Figure S2. Human common-cold CoV ELISA binding responses in chimeric and**

197 **monovalent SARS-CoV-2 spike mRNA-LNP-vaccinated mice.** Pre-immunization, post prime,  
198 and post boost binding to (A) HCoV-HKU1 spike, (B) HCoV-OC43 spike, (C) HCoV-229E  
199 spike, and (D) HCoV-NL63 spike. Statistical significance for the binding and blocking responses  
200 is reported from a Kruskal-Wallis test after Dunnett's multiple comparison correction. \*p <  
201 0.05, \*\*p < 0.01, \*\*\*p < 0.001, and \*\*\*\*p < 0.0001.

202

203 **Figure S3. Comparison of neutralizing antibody activity of CoV mRNA-LNP vaccines**

204 **against Sarbecoviruses.** (A) Group 1 neutralizing antibody responses against SARS-CoV-2,  
205 SARS-CoV, RsSHC014, and WIV-1 and (B) fold-change of SARS-CoV, RsSHC014, and WIV-  
206 1 neutralizing antibodies relative to SARS-CoV-2. (C) Group 2 neutralizing antibody responses

207 against SARS-CoV-2, SARS-CoV, RsSHC014, and WIV-1 and **(D)** fold-change of SARS-CoV,  
208 RsSHC014, and WIV-1 neutralizing antibodies relative to SARS-CoV-2. **(E)** Group 3  
209 neutralizing antibody responses against SARS-CoV-2, SARS-CoV, RsSHC014, and WIV-1 and  
210 **(F)** fold-change of SARS-CoV, RsSHC014, and WIV-1 neutralizing antibodies relative to  
211 SARS-CoV-2. **(G)** Group 4 neutralizing antibody responses against SARS-CoV-2, SARS-CoV,  
212 RsSHC014, and WIV-1 and **(H)** fold-change of SARS-CoV, RsSHC014, and WIV-1  
213 neutralizing antibodies relative to SARS-CoV-2.

214

215 **Figure S4. *In vivo* protection against Bt-CoV challenge by chimeric spikes mRNA-vaccines.**

216 **(A)** Percent starting weight from the different vaccine groups of mice challenged with full-length  
217 RsSHC014. **(B)** RsSHC014 lung viral titers in mice from the distinct vaccine groups. **(C)**  
218 RsSHC014 nasal turbinate titers in mice from the different immunization groups. **(D)** Percent  
219 starting weight from the different vaccine groups of mice challenged with RsSHC014-MA15.  
220 **(E)** RsSHC014-MA15 lung viral titers in mice from the distinct vaccine groups. **(F)** RsSHC014-  
221 MA15 nasal turbinate titers in mice from the different immunization groups. Statistical  
222 significance is reported from a one-way ANOVA after Tukey's multiple comparison correction.  
223 \* $p < 0.05$ , \*\* $p < 0.01$ , \*\*\* $p < 0.001$ , and \*\*\*\* $p < 0.0001$ .

224

225 **Figure S5. Survival analysis of immunized mice challenged with Sarbecoviruses. (A)**

226 Survival analysis at day 4 post infection from immunized mice infected with SARS-CoV MA15,  
227 **(B)** SARS-CoV-2 MA10, **(C)** Survival analysis at day 7 post infection from immunized mice  
228 infected with SARS-CoV-2 MA10, and **(D)** RsSHC014-MA15. Statistical significance is  
229 reported from a Mantel-Cox test.

230

231 **Figure S6. Detection of eosinophilic infiltrates in SARS-CoV MA15 challenged mice.**

232 (A) Group 1: rare scattered individual eosinophils in the interstitium with some small  
233 perivascular cuffs that lack eosinophils. (B) Group 2: Bronchiolar cuffs of leukocytes with rare  
234 eosinophils. (C) Group 3: Hyperplastic bronchus-associated lymphoid tissue (BALT) with rare  
235 eosinophils. (D) Group 4: frequent perivascular cuffs that contain eosinophils. (E) Group 5:  
236 frequent eosinophils in perivascular cuffs.

237

238 **Figure S7. Lung cytokine analysis in Sarbecovirus-challenged mice.** CCL2, IL-1 $\alpha$ , G-SCF,  
239 and CCL4 in (A) SARS-CoV-infected mice and in (B) SARS-CoV-2-infected mice. Statistical  
240 significance for the binding and blocking responses is reported from a Kruskal-Wallis test after  
241 Dunnett's multiple comparison correction. \*p < 0.05, \*\*p < 0.01, \*\*\*p < 0.001, and \*\*\*\*p < 0.0001.

242

243 **Table S1: Amino acid sequences of chimeric spikes.**

244

245

246

247

248

249

250

251

252

253

254

255

256

Figure S1

A

Immunization strategy and challenge viruses in the different vaccine groups.

| Vaccination group | Day 0 prime               | Day 21 boost              | Day 55 post prime challenge viruses                                                                           |
|-------------------|---------------------------|---------------------------|---------------------------------------------------------------------------------------------------------------|
| Group 1           | Chimera 1, 2, 3, 4        | Chimera 1, 2, 3, 4        | 1) SARS-CoV MA15, 2) SARS-CoV-2 MA10<br>3) RsSHC014, 4) RsSHC014-MA15<br>5) WIV-1, 6) SARS-CoV-2 B.1.351-MA10 |
| Group 2           | Chimera 1, 2              | Chimera 3, 4              | 1) SARS-CoV MA15, 2) SARS-CoV-2 MA10<br>3) RsSHC014, 4) RsSHC014-MA15<br>5) WIV-1, 6) SARS-CoV-2 B.1.351-MA10 |
| Group 3           | Chimera 4                 | Chimera 4                 | 1) SARS-CoV MA15, 2) SARS-CoV-2 MA10<br>3) RsSHC014, 4) RsSHC014-MA15<br>5) WIV-1, 6) SARS-CoV-2 B.1.351-MA10 |
| Group 4           | SARS-CoV-2 furin knockout | SARS-CoV-2 furin knockout | 1) SARS-CoV MA15, 2) SARS-CoV-2 MA10<br>3) RsSHC014, 4) RsSHC014-MA15<br>5) WIV-1, 6) SARS-CoV-2 B.1.351-MA10 |
| Group 5           | Norovirus capsid          | Norovirus capsid          | 1) SARS-CoV MA15, 2) SARS-CoV-2 MA10<br>3) RsSHC014, 4) RsSHC014-MA15<br>5) WIV-1, 6) SARS-CoV-2 B.1.351-MA10 |

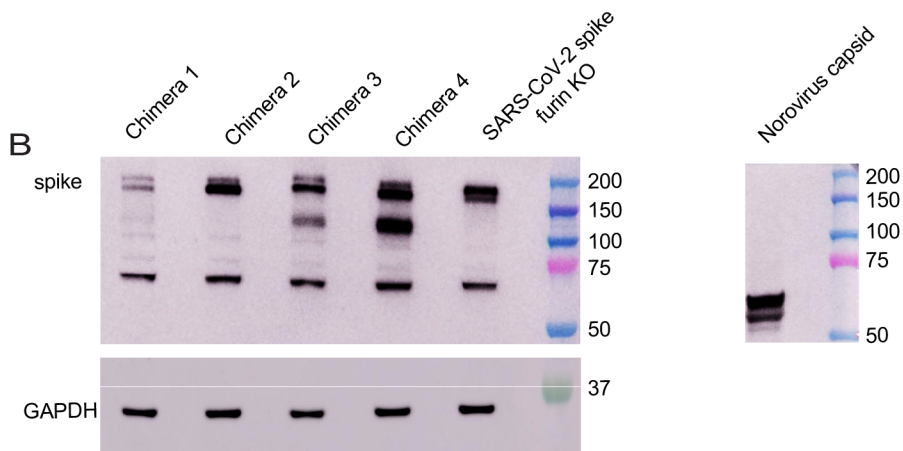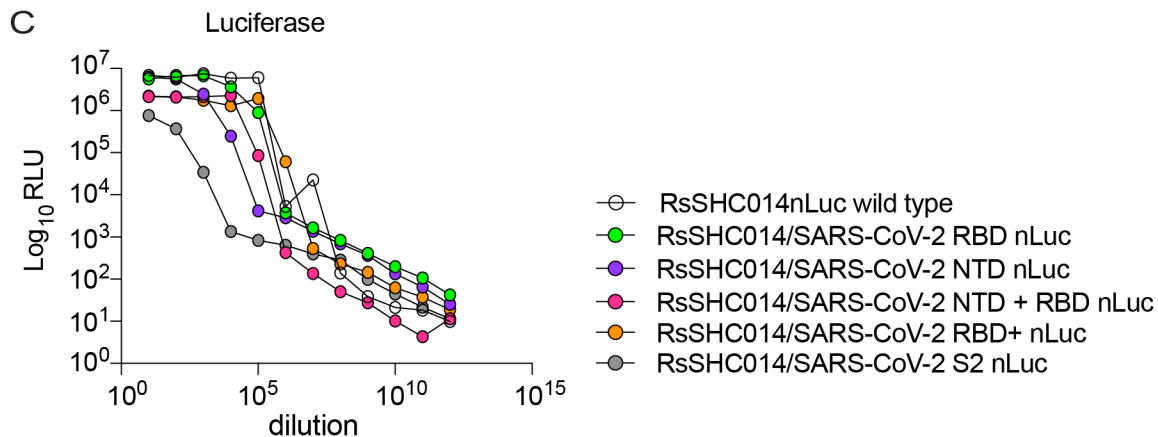

Figure S2

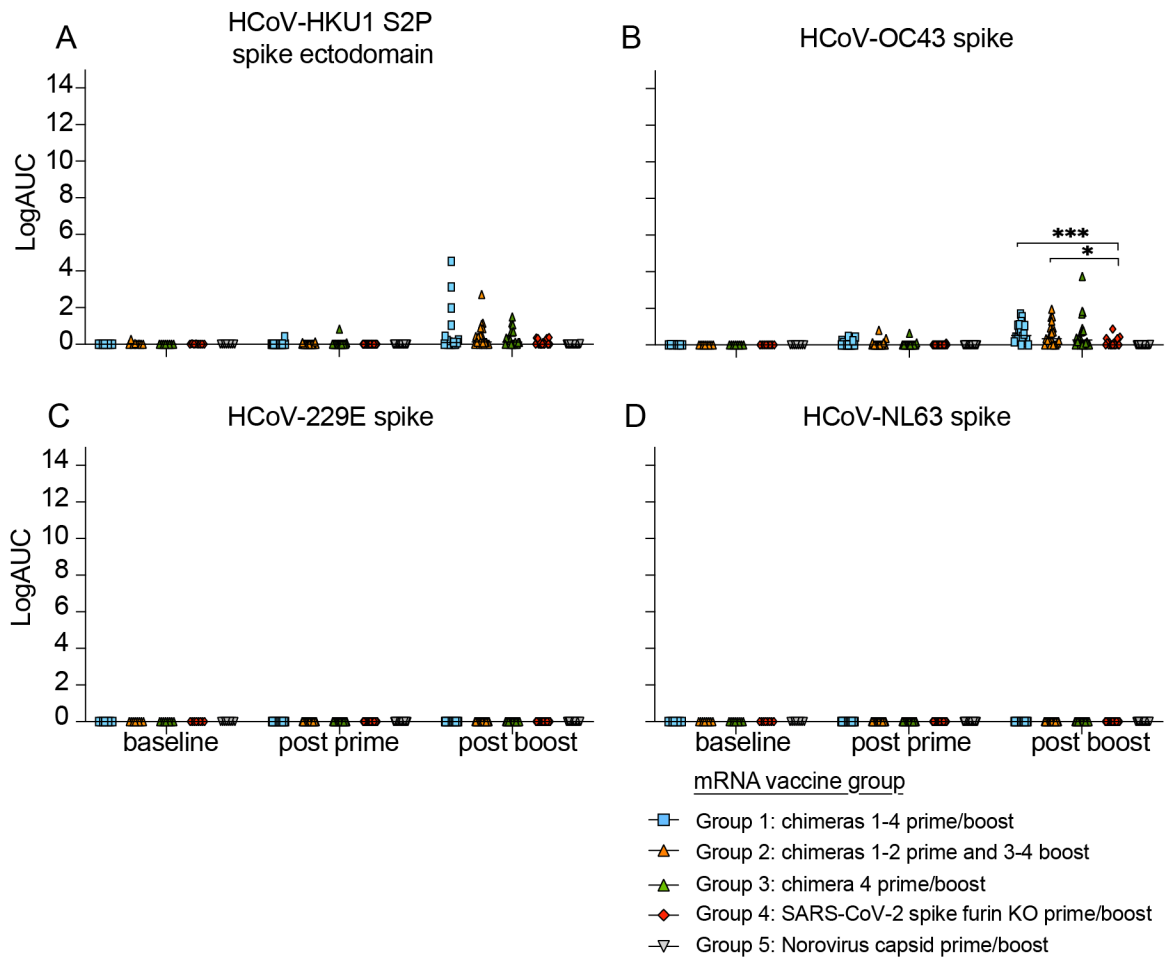

Figure S3

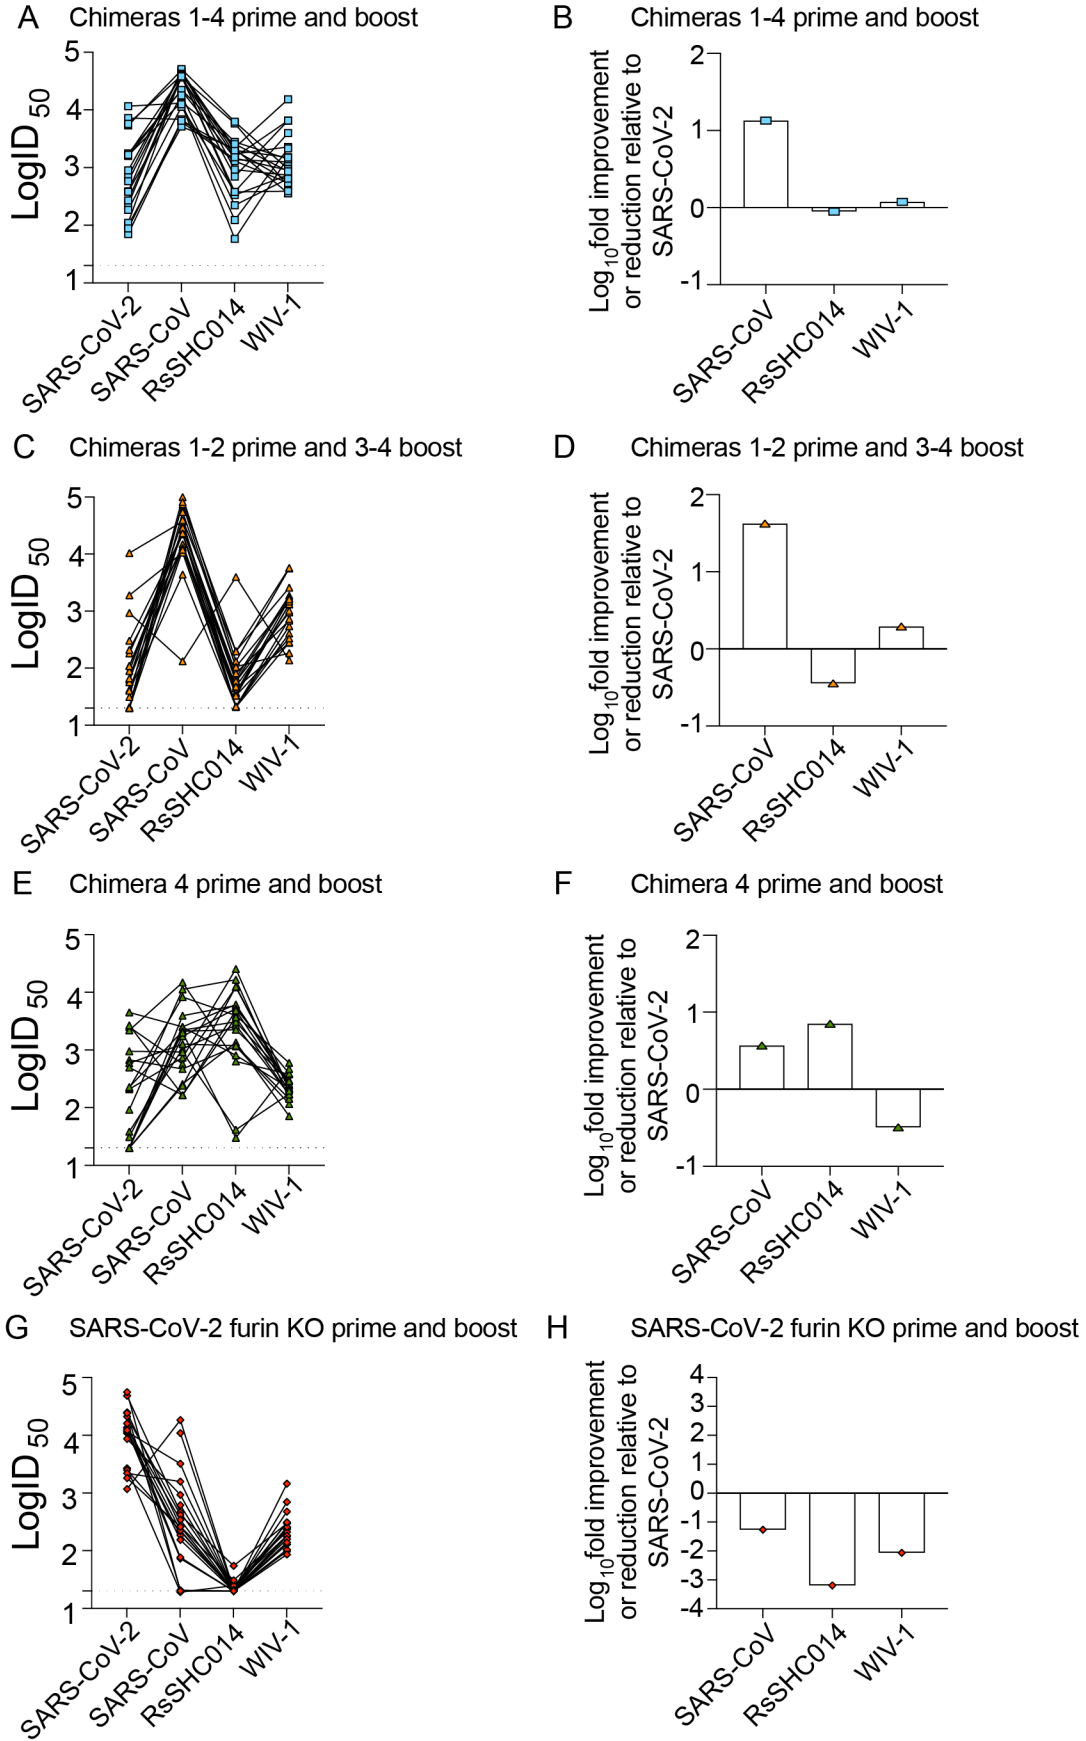

Figure S4

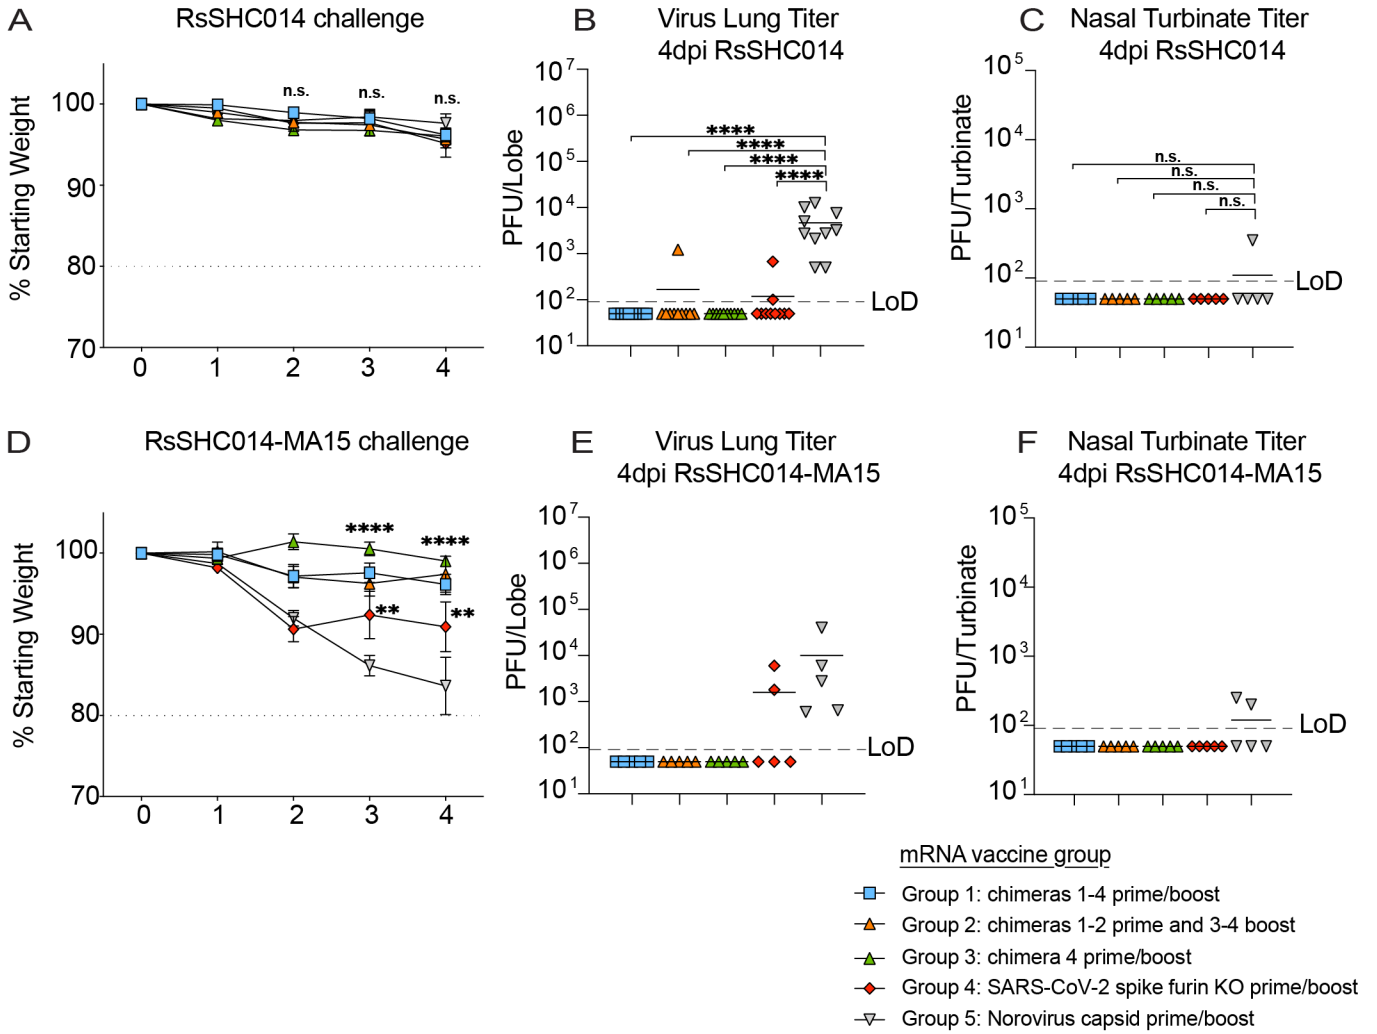



Figure S5

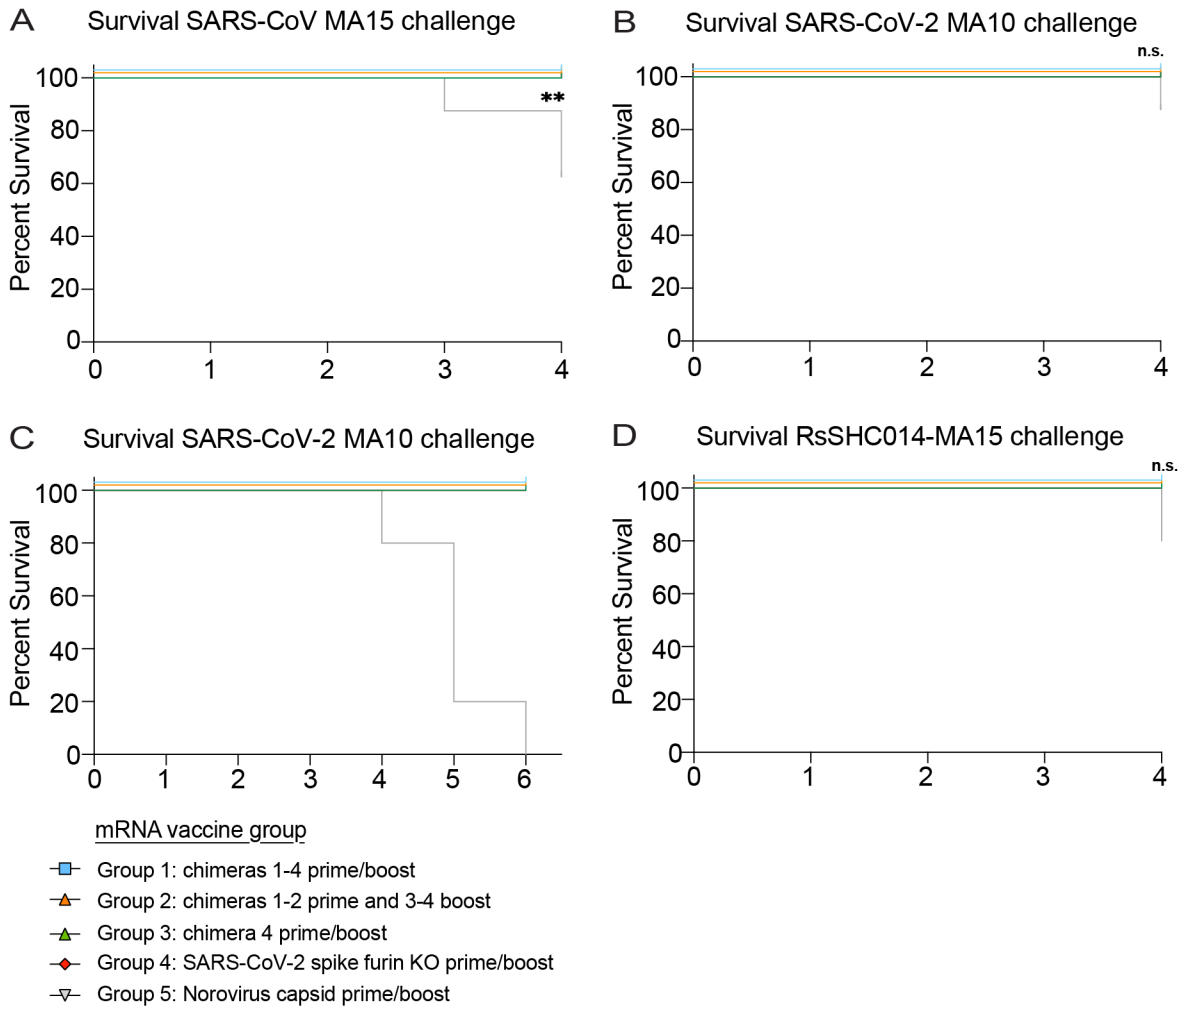

Figure S6

SARS-CoV challenge

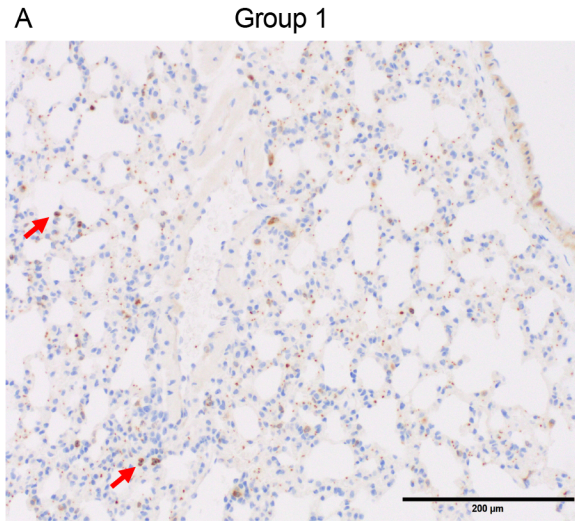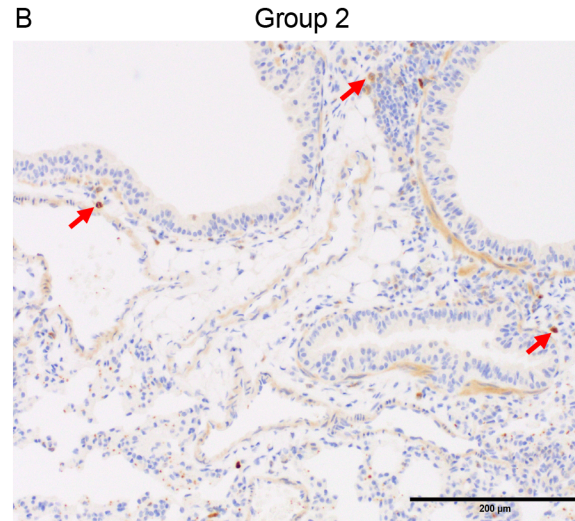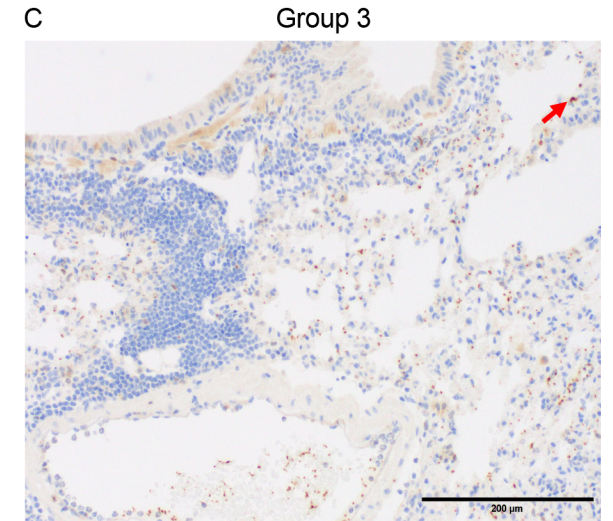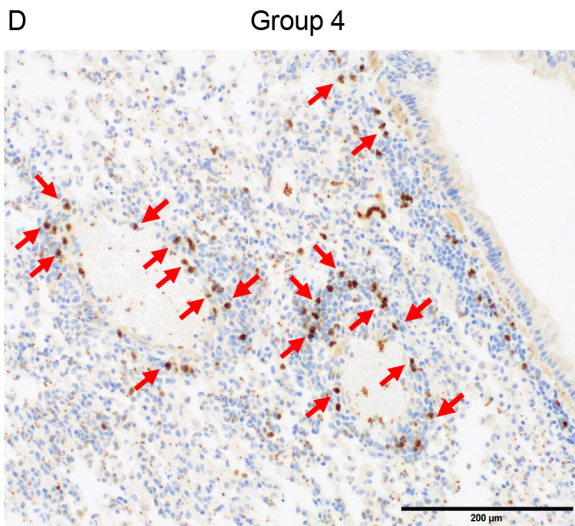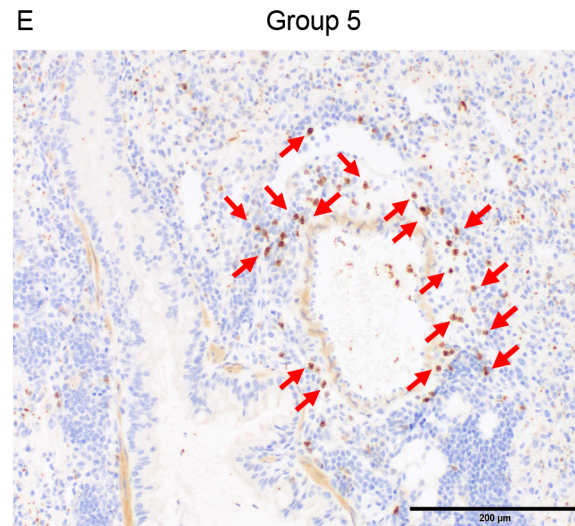

- mRNA vaccine group
- Group 1: chimeras 1-4 prime/boost
  - Group 2: chimeras 1-2 prime and 3-4 boost
  - Group 3: chimera 4 prime/boost
  - Group 4: SARS-CoV-2 spike furin KO prime/boost
  - Group 5: Norovirus capsid prime/boost

Figure S7

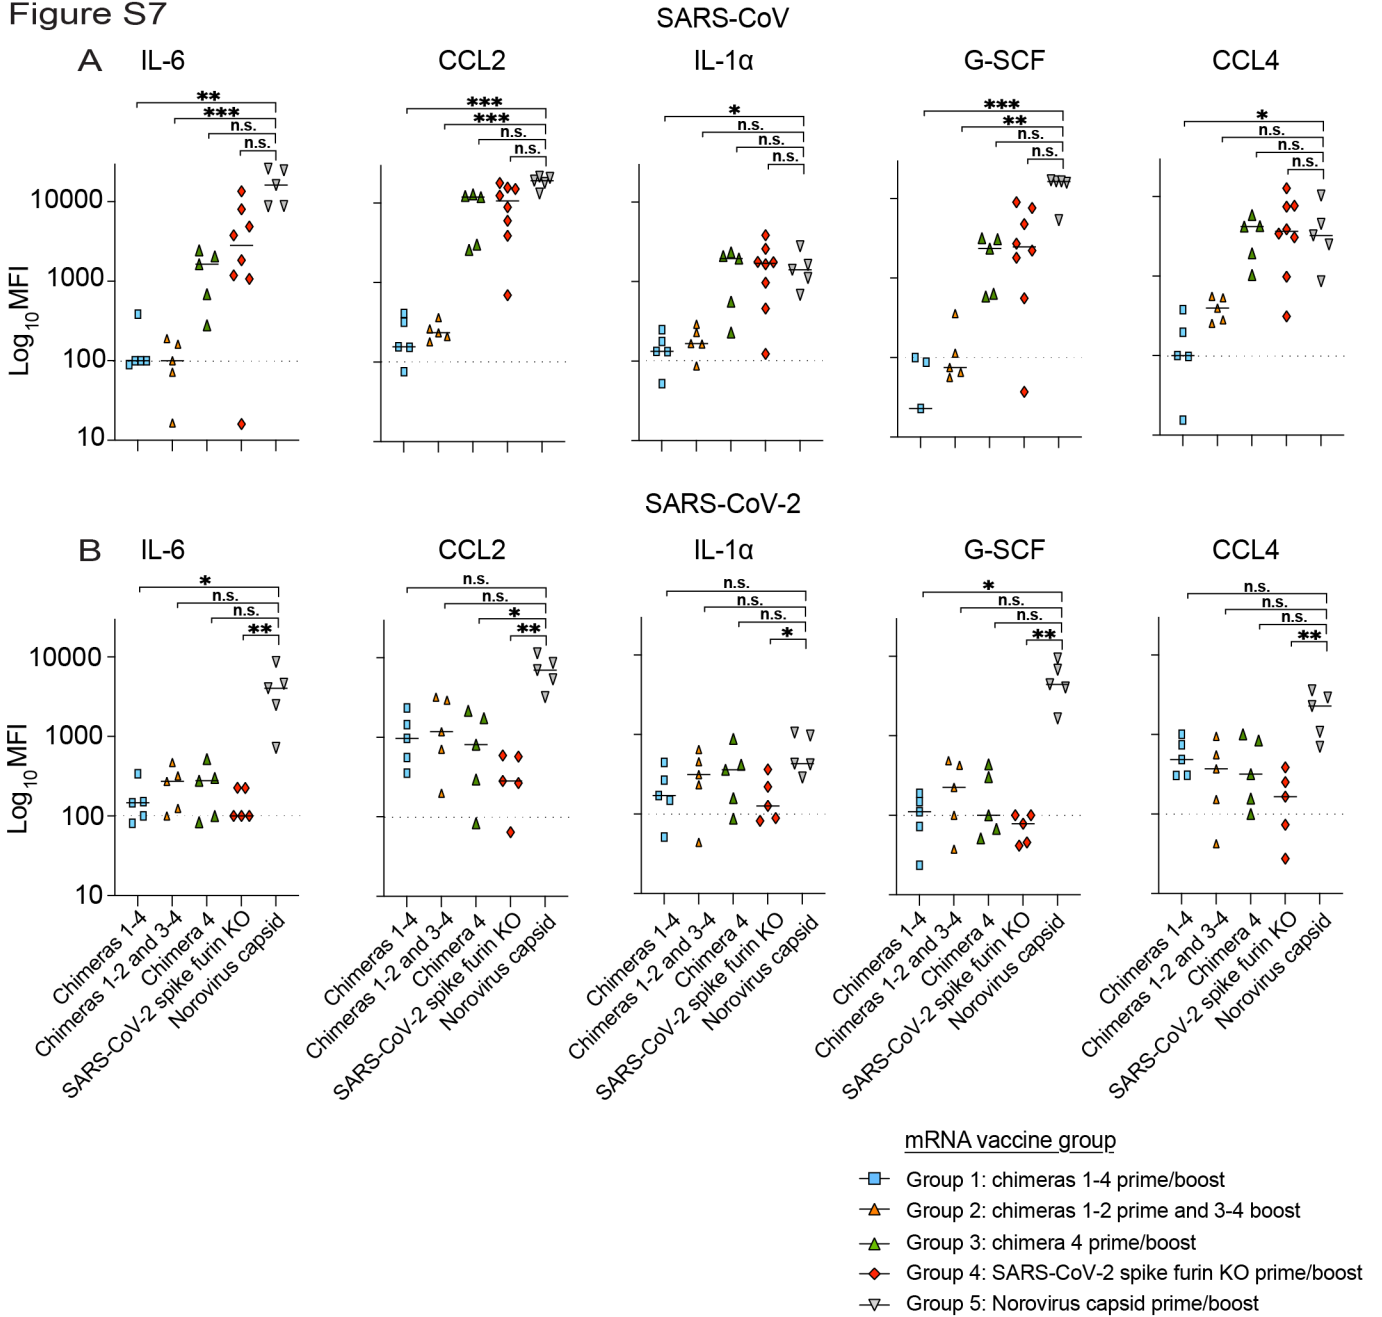

**Table S1: Amino acid sequences of chimeric spikes**

|            |                                                                                                                                                                                                                                                                                                                                                                                                                                                                                                                                                                                                                                                                                                                                                                                                                                                                                                                                                                                                                                                                                                                                                                                                                                                                                                                                                                                    |
|------------|------------------------------------------------------------------------------------------------------------------------------------------------------------------------------------------------------------------------------------------------------------------------------------------------------------------------------------------------------------------------------------------------------------------------------------------------------------------------------------------------------------------------------------------------------------------------------------------------------------------------------------------------------------------------------------------------------------------------------------------------------------------------------------------------------------------------------------------------------------------------------------------------------------------------------------------------------------------------------------------------------------------------------------------------------------------------------------------------------------------------------------------------------------------------------------------------------------------------------------------------------------------------------------------------------------------------------------------------------------------------------------|
| Chimera 1: | MAISGVPVLGFFIIAVLMSAQESWAGIHSRKPQPKMAQVSSRRGVYNDIFRSDVHLHTQDYFLPFDSNLQYFSLN<br>VSDRYTYFDNPILDFDGDVYFAATEKSNVIRGWIFGSSFDNTTQSAVIVNNSTHIIRVCNFNLCKEPMTVSRGTQQ<br>NAWVYQSAFNCTYDRVEKSFQLDTPKTGNFKDLREYVFKNRDGLSVYQTYTAVNLRGLPTGFSVLKPKLKLPGFI<br>NITSYRVVMAMFQSQTSNFLPESAAYYVGNLKYSTFMLRFNENGTITDAVDCSQNPLAELKCTIKNFTVEKGIYQTSN<br>FRVQPTEISVRFNPITNLCPFGEVFNATKFPVSVAWERKKISNCVADYSVLNYSFFSTFKCYGVSATKLNLDLCSNVY<br>ADSFVVKGDDVRIAPGQGTGVIADYNYKLPDDFMGCVLAWNTRNIDATSTGNYNYKYRYLRHGKLRPFERDISNVPF<br>SPDGKPCPTPALNICYWPLNDYGFYTTTIGYQPYRVVLSFELLNAPATVCGPKKSTNLVKNKCVNFNFNGLTGTGV<br>LTESNKKFLPFQFGRDIADTTDAVRDPQTLLEILDITPCSFGGVSVITPGTNTSNQVAVLYQDVNCTEVPVAIHADQLT<br>PTWRVYSTGSNVFQTRAGCLIGAEHVNNSYECDIPIGAGICASYQTQTNSPRRARSVASQSIIAYTMSLGAENSVAYS<br>NSIAIPTNFTISVTTEILPVSMTKTSVDCTMYICGDSTECNLLLQYGSFCTQLNRALTGIAVEQDKNTQEVFAQVKQIY<br>KTPPIKDFGGFNFSQILPDPSPKRSRFSIEDLLFNKVTLADAGFIKQYGDCLGDIARDLCAQKFNGLTVLPLLTDEMI<br>AQYTSALLAGTITSGWTFGAGAALQIPFAMQMAFRFNIGVGTQNVLYENQKLIANQFNSAIGKIQDSLSSTASALGKL<br>QDVVNQNAQALNTLVKQLSSNFGAISSVLNDILSRLDKVEAEVQIDRLITGRLQSLQTYVTQQLIRAAEIRASANLAAT<br>KMSECVLGGSKRVDFCGKGYHLSMFPQSAPHGVVFLHVTYVPAQEKNFTTAPAICHGDKAHFPREGVFSNGTHWF<br>VTQRNFYEPQIITDNTFVSGNCDVVIGIVNNTVYDPLQPELDSFKEELDKYFKNHTSPDVLDGDISGINASVNIQKEI<br>DRLNEVAKNLNESLIDLQELGKYEQYIKWPWYIWLGFIAGLIAIVMVTIMLCCMTSCCSCLKGCCSCGCKCFDEDDSD<br>EPVLKGVKLYHT                  |
| Chimera 2: | MAISGVPVLGFFIIAVLMSAQESWASDLDRCTTDFDDVQAPNYTQHTSSMRGVYYPDEIFRSDTLYLTQDLFLPFYSNV<br>TGFHTINHTFGNVPVFPKFDGIYFAATEKSNVVRGWVFGSTMNKSQSVIINNSNIVIRACNFELCDNPPFAVSKPMGT<br>QHTMIFDNANFCTFEYISDAFSLDVSEKSGNFKHLREFVFNKNDGFLVYVYKGYQPIDVVRDLPSGFNTLKPFLKPLGI<br>NITNFRILTAFASPAQDIWGTSAAYFVGYLKPFTFMLKYDENGITDAVDCSQNPLAELKCSVKSEIDKGIYQTSNF<br>RVVPSGDVVRFPNITNLCPFGEVFNATRFASVVAWNRKRISNCVADYSVLNYSASFSTFKCYGVSPTKLNLDLCSNVY<br>ADSFVIRGDEVRIAPGQGTGVIADYNYKLPDDFTGCVIANNLNLDKSVGGNYYLYRFRKSNLKPFRDISNYIQA<br>GSTPCNGVEGFNCFYPLQSYGFQPTNGVGYQPYRVVLSFELLHAPATVCGPKLSTDLIKNQCVNFNFNGLTGTGVL<br>PSSKRFQPFQFGRDVSDFDTSVRDPKTEILDISPCSFGGVSVITPGTNASSEVAVLYQDVNCTDVTVAIHADQLTPAW<br>RIYSTGNVYQTAQKLGAEHVDTSYECDIPIGAGICASYHTVSLRSTSQSIVAYTMSLGAESSIAYSNNTAIPTNFY<br>SISITTEVMVPMQAKTSVDCNMYICGDSTECANLLQYGSFCTQLNRALSGIAAEQDRNTRVFAQVKQMYKTPITLKY<br>FGGFNFSQILPDPKPKRSFIEDLLFNKVTLADAGFMKQYGECLGDINARDLCAQKFNGLTVLPLLTDDMIAAYTA<br>ALVSGTATAGWTFGAGAALQIPFAMQMAFRFNIGVGTQNVLYENQKLIANQFNKAIQIESLTTTSTALGKLQDVV<br>NQNAQALNTLVKQLSSNFGAISSVLNDILSRLDKVEAEVQIDRLITGRLQSLQTYVTQQLIRAAEIRASANLAATKMSE<br>CVLGGSKRVDFCGKGYHLSMFPQAAPHGVVFLHVTYVPSQERNFTTAPAICHEGKAYFPREGVFSVFNWTSWITQRNF<br>FSPQIITDNTFVSGNCDVVIGIINNTVYDPLQPELDSFKEELDKYFKNHTSPDVLDGDISGINASVNIQKEIDRLNEVA<br>KNLNEIDLQELGKYEQYIKWPWYIWLGFIAGLIAIVMVTILLCCMTSCCSCLKGACSCGCKCFDEDDSEPVKGV<br>KLHYT                               |
| Chimera 3: | MAISGVPVLGFFIIAVLMSAQESWAVNLTTRTQLPPAYTNSFTRGVYYPDKVFRSSVLHSTQDLFLPFFSNVTWFHAIH<br>VSGTNGTKRFDNPVLPFNDGVYFASTEKSNIRGWIFGTTLDSKTQSLLIIVNATNVVIVCFEFCNDPFLGVYYHKN<br>NKSWMSEFRVYSSANNCTFEYVSQPFMLDLEGKQGNFKNLREFVFNKIDGYFKIYSKHTPINLVRDLPGQFSALEPL<br>VDLPIGINITRFQTLALHRSYLTGDSSSGWTAGAAAAYVGYLQPRFTLLKYENGTITDAVDCALDPLSETKCTLKS<br>FTVEKGIYQTSNFRVQPTESVRFNPITNLCPFGEVFNATKFPVSVAWERKKISNCVADYSVLNYSFFSTFKCYGVSAT<br>KLNLDLCSNVYADSFVVKGDDVRIAPGQGTGVIADYNYKLPDDFMGCVLAWNTRNIDATSTGNYNYKYRYLRHGKLR<br>RPFERDISNVFSPDGKPCPTPALNICYWPLNDYGFYTTTIGYQPYRVVLSFELLNAPATVCGPKKSTNLVKNKCVN<br>FNFNGLTGTGVLTESNKKFLPFQFGRDIADTTDAVRDPQTLLEILDITPCSFGGVSVITPGTNTSNQVAVLYQDVNCTE<br>VPVAIHADQLTPTWRVYSTGSNVFQTRAGCLIGAEHVNNSYECDIPIGAGICASYQTQTNSPRRARSVASQSIIAYTMSL<br>GAENSVAYSNSIAIPTNFTISVTTEILPVSMTKTSVDCTMYICGDSTECNLLLQYGSFCTQLNRALTGIAVEQDKNTQ<br>EVFAQVKQIYKTPPIKDFGGFNFSQILPDPSPKRSRFSIEDLLFNKVTLADAGFIKQYGDCLGDIARDLCAQKFNGLT<br>VLPPLLTDEMIAYTSALLAGTITSGWTFGAGAALQIPFAMQMAFRFNIGVGTQNVLYENQKLIANQFNSAIGKIQDS<br>LSSTASALGKLQDVVNQNAQALNTLVKQLSSNFGAISSVLNDILSRLDKVEAEVQIDRLITGRLQSLQTYVTQQLIRAA<br>EIRASANLAATKMSECVLGGSKRVDFCGKGYHLSMFPQSAPHGVVFLHVTYVPAQEKNFTTAPAICHGDKAHFPREG<br>VFSVNGTHWFVTQRNFYEPQIITDNTFVSGNCDVVIGIVNNTVYDPLQPELDSFKEELDKYFKNHTSPDVLDGDISGI<br>NASVNIQKEIDRLNEVAKNLNESLIDLQELGKYEQYIKWPWYIWLGFIAGLIAIVMVTIMLCCMTSCCSCLKGCCSCG<br>SCKCFDEDDSEPVKGVKLYHT   |
| Chimera 4: | MAISGVPVLGFFIIAVLMSAQESWAVNLTTRTQLPPAYTNSFTRGVYYPDKVFRSSVLHSTQDLFLPFFSNVTWFHAIH<br>VSGTNGTKRFDNPVLPFNDGVYFASTEKSNIRGWIFGTTLDSKTQSLLIIVNATNVVIVCFEFCNDPFLGVYYHKN<br>NKSWMSEFRVYSSANNCTFEYVSQPFMLDLEGKQGNFKNLREFVFNKIDGYFKIYSKHTPINLVRDLPGQFSALEPL<br>VDLPIGINITRFQTLALHRSYLTGDSSSGWTAGAAAAYVGYLQPRFTLLKYENGTITDAVDCALDPLSETKCTLKS<br>FTVEKGIYQTSNFRVQPTESVRFNPITNLCPFGEVFNATTFPSVVAWERKRISNCVADYSVLNYSFFSTFKCYGVSAT<br>KLNLDLCSNVYADSFVVKGDDVRIAPGQGTGVIADYNYKLPDDFMGCVLAWNTRNIDATSTGNYNYKYRYLRHGKLR<br>NPFERDISNDIYSPGGQSCSAVGPNCYNPLRPYGFFTTAVGQGHQPYRVVLSFELLNAPATVCGPKKSTNLVKNKCVN<br>FNFNGLTGTGVLTESNKKFLPFQFGRDIADTTDAVRDPQTLLEILDITPCSFGGVSVITPGTNTSNQVAVLYQDVNCTE<br>VPVAIHADQLTPTWRVYSTGSNVFQTRAGCLIGAEHVNNSYECDIPIGAGICASYQTQTNSPRRARSVASQSIIAYTMSL<br>GAENSVAYSNSIAIPTNFTISVTTEILPVSMTKTSVDCTMYICGDSTECNLLLQYGSFCTQLNRALTGIAVEQDKNTQ<br>EVFAQVKQIYKTPPIKDFGGFNFSQILPDPSPKRSRFSIEDLLFNKVTLADAGFIKQYGDCLGDIARDLCAQKFNGLT<br>VLPPLLTDEMIAYTSALLAGTITSGWTFGAGAALQIPFAMQMAFRFNIGVGTQNVLYENQKLIANQFNSAIGKIQDS<br>LSSTASALGKLQDVVNQNAQALNTLVKQLSSNFGAISSVLNDILSRLDKVEAEVQIDRLITGRLQSLQTYVTQQLIRAA<br>EIRASANLAATKMSECVLGGSKRVDFCGKGYHLSMFPQSAPHGVVFLHVTYVPAQEKNFTTAPAICHGDKAHFPREG<br>VFSVNGTHWFVTQRNFYEPQIITDNTFVSGNCDVVIGIVNNTVYDPLQPELDSFKEELDKYFKNHTSPDVLDGDISGI<br>NASVNIQKEIDRLNEVAKNLNESLIDLQELGKYEQYIKWPWYIWLGFIAGLIAIVMVTIMLCCMTSCCSCLKGCCSCG<br>SCKCFDEDDSEPVKGVKLYHT |

## References and Notes

1. J. D. Cherry, P. Krogstad, SARS: The first pandemic of the 21st century. *Pediatr. Res.* **56**, 1–5 (2004). [doi:10.1203/01.PDR.0000129184.87042.FC](https://doi.org/10.1203/01.PDR.0000129184.87042.FC) [Medline](#)
2. A. M. Zaki, S. van Boheemen, T. M. Bestebroer, A. D. Osterhaus, R. A. Fouchier, Isolation of a novel coronavirus from a man with pneumonia in Saudi Arabia. *N. Engl. J. Med.* **367**, 1814–1820 (2012). [doi:10.1056/NEJMoa1211721](https://doi.org/10.1056/NEJMoa1211721) [Medline](#)
3. C. I. Paules, H. D. Marston, A. S. Fauci, Coronavirus Infections—More Than Just the Common Cold. *JAMA* **323**, 707–708 (2020). [doi:10.1001/jama.2020.0757](https://doi.org/10.1001/jama.2020.0757) [Medline](#)
4. P. Zhou, X.-L. Yang, X.-G. Wang, B. Hu, L. Zhang, W. Zhang, H.-R. Si, Y. Zhu, B. Li, C.-L. Huang, H.-D. Chen, J. Chen, Y. Luo, H. Guo, R.-D. Jiang, M.-Q. Liu, Y. Chen, X.-R. Shen, X. Wang, X.-S. Zheng, K. Zhao, Q.-J. Chen, F. Deng, L.-L. Liu, B. Yan, F.-X. Zhan, Y.-Y. Wang, G.-F. Xiao, Z.-L. Shi, A pneumonia outbreak associated with a new coronavirus of probable bat origin. *Nature* **579**, 270–273 (2020). [doi:10.1038/s41586-020-2012-7](https://doi.org/10.1038/s41586-020-2012-7) [Medline](#)
5. Coronaviridae Study Group of the International Committee on Taxonomy of Viruses, The species Severe acute respiratory syndrome-related coronavirus: Classifying 2019-nCoV and naming it SARS-CoV-2. *Nat. Microbiol.* **5**, 536–544 (2020). [doi:10.1038/s41564-020-0695-z](https://doi.org/10.1038/s41564-020-0695-z) [Medline](#)
6. V. D. Menachery, B. L. Yount Jr., K. Debbink, S. Agnihothram, L. E. Gralinski, J. A. Plante, R. L. Graham, T. Scobey, X.-Y. Ge, E. F. Donaldson, S. H. Randell, A. Lanzavecchia, W. A. Marasco, Z.-L. Shi, R. S. Baric, A SARS-like cluster of circulating bat coronaviruses shows potential for human emergence. *Nat. Med.* **21**, 1508–1513 (2015). [doi:10.1038/nm.3985](https://doi.org/10.1038/nm.3985) [Medline](#)
7. V. D. Menachery, B. L. Yount Jr., A. C. Sims, K. Debbink, S. S. Agnihothram, L. E. Gralinski, R. L. Graham, T. Scobey, J. A. Plante, S. R. Royal, J. Swanstrom, T. P. Sheahan, R. J. Pickles, D. Corti, S. H. Randell, A. Lanzavecchia, W. A. Marasco, R. S. Baric, SARS-like WIV1-CoV poised for human emergence. *Proc. Natl. Acad. Sci. U.S.A.* **113**, 3048–3053 (2016). [doi:10.1073/pnas.1517719113](https://doi.org/10.1073/pnas.1517719113) [Medline](#)
8. B. Hu, L.-P. Zeng, X.-L. Yang, X.-Y. Ge, W. Zhang, B. Li, J.-Z. Xie, X.-R. Shen, Y.-Z. Zhang, N. Wang, D.-S. Luo, X.-S. Zheng, M.-N. Wang, P. Daszak, L.-F. Wang, J. Cui, Z.-L. Shi, Discovery of a rich gene pool of bat SARS-related coronaviruses provides new insights into the origin of SARS coronavirus. *PLOS Pathog.* **13**, e1006698 (2017). [doi:10.1371/journal.ppat.1006698](https://doi.org/10.1371/journal.ppat.1006698) [Medline](#)
9. T. P. Sheahan, A. C. Sims, R. L. Graham, V. D. Menachery, L. E. Gralinski, J. B. Case, S. R. Leist, K. Pyrc, J. Y. Feng, I. Trantcheva, R. Bannister, Y. Park, D. Babusis, M. O. Clarke, R. L. Mackman, J. E. Spahn, C. A. Palmiotti, D. Siegel, A. S. Ray, T. Cihlar, R. Jordan, M. R. Denison, R. S. Baric, Broad-spectrum antiviral GS-5734 inhibits both epidemic and zoonotic coronaviruses. *Sci. Transl. Med.* **9**, eaal3653 (2017). [doi:10.1126/scitranslmed.aal3653](https://doi.org/10.1126/scitranslmed.aal3653) [Medline](#)
10. C. G. Rappazzo, L. V. Tse, C. I. Kaku, D. Wrapp, M. Sakharkar, D. Huang, L. M. Deveau, T. J. Yockachonis, A. S. Herbert, M. B. Battles, C. M. O'Brien, M. E. Brown, J. C. Geoghegan, J. Belk, L. Peng, L. Yang, Y. Hou, T. D. Scobey, D. R. Burton, D. Nemazee,

- J. M. Dye, J. E. Voss, B. M. Gunn, J. S. McLellan, R. S. Baric, L. E. Gralinski, L. M. Walker, Broad and potent activity against SARS-like viruses by an engineered human monoclonal antibody. *Science* **371**, 823–829 (2021). [doi:10.1126/science.abf4830](https://doi.org/10.1126/science.abf4830)  
[Medline](#)
11. D. R. Martinez *et al.*, A broadly neutralizing antibody protects against SARS-CoV, pre-emergent bat CoVs, and SARS-CoV-2 variants in mice. *bioRxiv* [Preprint] 28 April 2021. [doi:10.1101/2021.04.27.441655](https://doi.org/10.1101/2021.04.27.441655).
  12. W. N. Voss, Y. J. Hou, N. V. Johnson, G. Delidakis, J. E. Kim, K. Javanmardi, A. P. Horton, F. Bartzoka, C. J. Paresi, Y. Tanno, C.-W. Chou, S. A. Abbasi, W. Pickens, K. George, D. R. Boutz, D. M. Towers, J. R. McDaniel, D. Billick, J. Goike, L. Rowe, D. Batra, J. Pohl, J. Lee, S. Gangappa, S. Sambhara, M. Gadush, N. Wang, M. D. Person, B. L. Iverson, J. D. Gollihar, J. M. Dye, A. S. Herbert, I. J. Finkelstein, R. S. Baric, J. S. McLellan, G. Georgiou, J. J. Lavinder, G. C. Ippolito, Prevalent, protective, and convergent IgG recognition of SARS-CoV-2 non-RBD spike epitopes. *Science* **372**, 1108–1112 (2021). [doi:10.1126/science.abg5268](https://doi.org/10.1126/science.abg5268) [Medline](#)
  13. C. Graham, J. Seow, I. Huettner, H. Khan, N. Kouphou, S. Acors, H. Winstone, S. Pickering, R. P. Galao, L. Dupont, M. J. Lista, J. M. Jimenez-Guardeño, A. G. Laing, Y. Wu, M. Joseph, L. Muir, M. J. van Gils, W. M. Ng, H. M. E. Duyvesteyn, Y. Zhao, T. A. Bowden, M. Shankar-Hari, A. Rosa, P. Cherepanov, L. E. McCoy, A. C. Hayday, S. J. D. Neil, M. H. Malim, K. J. Doores, Neutralization potency of monoclonal antibodies recognizing dominant and subdominant epitopes on SARS-CoV-2 Spike is impacted by the B.1.1.7 variant. *Immunity* **54**, 1276–1289.e6 (2021). [doi:10.1016/j.immuni.2021.03.023](https://doi.org/10.1016/j.immuni.2021.03.023) [Medline](#)
  14. L. Premkumar, B. Segovia-Chumbez, R. Jadi, D. R. Martinez, R. Raut, A. Markmann, C. Cornaby, L. Bartelt, S. Weiss, Y. Park, C. E. Edwards, E. Weimer, E. M. Scherer, N. Roupheal, S. Edupuganti, D. Weiskopf, L. V. Tse, Y. J. Hou, D. Margolis, A. Sette, M. H. Collins, J. Schmitz, R. S. Baric, A. M. de Silva, The receptor binding domain of the viral spike protein is an immunodominant and highly specific target of antibodies in SARS-CoV-2 patients. *Sci. Immunol.* **5**, eabc8413 (2020). [doi:10.1126/sciimmunol.abc8413](https://doi.org/10.1126/sciimmunol.abc8413) [Medline](#)
  15. L. Liu, P. Wang, M. S. Nair, J. Yu, M. Rapp, Q. Wang, Y. Luo, J. F.-W. Chan, V. Sahi, A. Figueroa, X. V. Guo, G. Cerutti, J. Bimela, J. Gorman, T. Zhou, Z. Chen, K.-Y. Yuen, P. D. Kwong, J. G. Sodroski, M. T. Yin, Z. Sheng, Y. Huang, L. Shapiro, D. D. Ho, Potent neutralizing antibodies against multiple epitopes on SARS-CoV-2 spike. *Nature* **584**, 450–456 (2020). [doi:10.1038/s41586-020-2571-7](https://doi.org/10.1038/s41586-020-2571-7) [Medline](#)
  16. L. Dai, T. Zheng, K. Xu, Y. Han, L. Xu, E. Huang, Y. An, Y. Cheng, S. Li, M. Liu, M. Yang, Y. Li, H. Cheng, Y. Yuan, W. Zhang, C. Ke, G. Wong, J. Qi, C. Qin, J. Yan, G. F. Gao, A Universal Design of Betacoronavirus Vaccines against COVID-19, MERS, and SARS. *Cell* **182**, 722–733.e11 (2020). [doi:10.1016/j.cell.2020.06.035](https://doi.org/10.1016/j.cell.2020.06.035) [Medline](#)
  17. D. Li *et al.*, The functions of SARS-CoV-2 neutralizing and infection-enhancing antibodies in vitro and in mice and nonhuman primates. *bioRxiv* [Preprint] 2 January 2021. [doi:10.1101/2020.12.31.424729](https://doi.org/10.1101/2020.12.31.424729).

18. A. R. Shiakolas, K. J. Kramer, D. Wrapp, S. I. Richardson, A. Schäfer, S. Wall, N. Wang, K. Janowska, K. A. Pilewski, R. Venkat, R. Parks, N. P. Manamela, N. Raju, E. F. Fechter, C. M. Holt, N. Suryadevara, R. E. Chen, D. R. Martinez, R. S. Nargi, R. E. Sutton, J. E. Ledgerwood, B. S. Graham, M. S. Diamond, B. F. Haynes, P. Acharya, R. H. Carnahan, J. E. Crowe Jr., R. S. Baric, L. Morris, J. S. McLellan, I. S. Georgiev, Cross-reactive coronavirus antibodies with diverse epitope specificities and Fc effector functions. *Cell Rep. Med.* **2**, 100313 (2021). [doi:10.1016/j.xcrm.2021.100313](https://doi.org/10.1016/j.xcrm.2021.100313) [Medline](#)
19. M. McCallum, A. De Marco, F. A. Lempp, M. A. Tortorici, D. Pinto, A. C. Walls, M. Beltramello, A. Chen, Z. Liu, F. Zatta, S. Zepeda, J. di Iulio, J. E. Bowen, M. Montiel-Ruiz, J. Zhou, L. E. Rosen, S. Bianchi, B. Guarino, C. S. Fregni, R. Abdelnabi, S. C. Foo, P. W. Rothlauf, L.-M. Bloyet, F. Benigni, E. Cameroni, J. Neyts, A. Riva, G. Snell, A. Telenti, S. P. J. Whelan, H. W. Virgin, D. Corti, M. S. Pizzuto, D. Veessler, N-terminal domain antigenic mapping reveals a site of vulnerability for SARS-CoV-2. *Cell* **184**, 2332–2347.e16 (2021). [doi:10.1016/j.cell.2021.03.028](https://doi.org/10.1016/j.cell.2021.03.028) [Medline](#)
20. N. Suryadevara, S. Shrihari, P. Gilchuk, L. A. VanBlargan, E. Binshtein, S. J. Zost, R. S. Nargi, R. E. Sutton, E. S. Winkler, E. C. Chen, M. E. Fouch, E. Davidson, B. J. Doranz, R. E. Chen, P.-Y. Shi, R. H. Carnahan, L. B. Thackray, M. S. Diamond, J. E. Crowe Jr., Neutralizing and protective human monoclonal antibodies recognizing the N-terminal domain of the SARS-CoV-2 spike protein. *Cell* **184**, 2316–2331.e15 (2021). [doi:10.1016/j.cell.2021.03.029](https://doi.org/10.1016/j.cell.2021.03.029) [Medline](#)
21. M. M. Becker, R. L. Graham, E. F. Donaldson, B. Rockx, A. C. Sims, T. Sheahan, R. J. Pickles, D. Corti, R. E. Johnston, R. S. Baric, M. R. Denison, Synthetic recombinant bat SARS-like coronavirus is infectious in cultured cells and in mice. *Proc. Natl. Acad. Sci. U.S.A.* **105**, 19944–19949 (2008). [doi:10.1073/pnas.0808116105](https://doi.org/10.1073/pnas.0808116105) [Medline](#)
22. D. Laczko, M. J. Hogan, S. A. Toulmin, P. Hicks, K. Lederer, B. T. Gaudette, D. Castaño, F. Amanat, H. Muramatsu, T. H. Oguin 3rd, A. Ojha, L. Zhang, Z. Mu, R. Parks, T. B. Manzoni, B. Roper, S. Strohmeier, I. Tombácz, L. Arwood, R. Nachbagauer, K. Karikó, J. Greenhouse, L. Pessaint, M. Porto, T. Putman-Taylor, A. Strasbaugh, T.-A. Campbell, P. J. C. Lin, Y. K. Tam, G. D. Sempowski, M. Farzan, H. Choe, K. O. Saunders, B. F. Haynes, H. Andersen, L. C. Eisenlohr, D. Weissman, F. Krammer, P. Bates, D. Allman, M. Locci, N. Pardi, A Single Immunization with Nucleoside-Modified mRNA Vaccines Elicits Strong Cellular and Humoral Immune Responses against SARS-CoV-2 in Mice. *Immunity* **53**, 724–732.e7 (2020). [doi:10.1016/j.immuni.2020.07.019](https://doi.org/10.1016/j.immuni.2020.07.019) [Medline](#)
23. P. Zhou *et al.*, A protective broadly cross-reactive human antibody defines a conserved site of vulnerability on beta-coronavirus spikes. *bioRxiv* [Preprint] 31 March 2021. [doi:10.1101/2021.03.30.437769](https://doi.org/10.1101/2021.03.30.437769).
24. K. Lederer, D. Castaño, D. Gómez Atria, T. H. Oguin 3rd, S. Wang, T. B. Manzoni, H. Muramatsu, M. J. Hogan, F. Amanat, P. Cherubin, K. A. Lundgreen, Y. K. Tam, S. H. Y. Fan, L. C. Eisenlohr, I. Maillard, D. Weissman, P. Bates, F. Krammer, G. D. Sempowski, N. Pardi, M. Locci, SARS-CoV-2 mRNA Vaccines Foster Potent Antigen-Specific Germinal Center Responses Associated with Neutralizing Antibody Generation. *Immunity* **53**, 1281–1295.e5 (2020). [doi:10.1016/j.immuni.2020.11.009](https://doi.org/10.1016/j.immuni.2020.11.009) [Medline](#)

25. D. E. Gordon, J. Hiatt, M. Bouhaddou, V. V. Rezelj, S. Ulferts, H. Braberg, A. S. Jureka, K. Obernier, J. Z. Guo, J. Batra, R. M. Kaake, A. R. Weckstein, T. W. Owens, M. Gupta, S. Pourmal, E. W. Titus, M. Cakir, M. Soucheray, M. McGregor, Z. Cakir, G. Jang, M. J. O'Meara, T. A. Tummino, Z. Zhang, H. Foussard, A. Rojic, Y. Zhou, D. Kuchenov, R. Hüttenhain, J. Xu, M. Eckhardt, D. L. Swaney, J. M. Fabius, M. Ummadi, B. Tutuncuoglu, U. Rathore, M. Modak, P. Haas, K. M. Haas, Z. Z. C. Naing, E. H. Pulido, Y. Shi, I. Barrio-Hernandez, D. Memon, E. Petsalaki, A. Dunham, M. C. Marrero, D. Burke, C. Koh, T. Vallet, J. A. Silvas, C. M. Azumaya, C. Billesbølle, A. F. Brilot, M. G. Campbell, A. Diallo, M. S. Dickinson, D. Diwanji, N. Herrera, N. Hoppe, H. T. Kratochvil, Y. Liu, G. E. Merz, M. Moritz, H. C. Nguyen, C. Nowotny, C. Puchades, A. N. Rizo, U. Schulze-Gahmen, A. M. Smith, M. Sun, I. D. Young, J. Zhao, D. Asarnow, J. Biel, A. Bowen, J. R. Braxton, J. Chen, C. M. Chio, U. S. Chio, I. Deshpande, L. Doan, B. Faust, S. Flores, M. Jin, K. Kim, V. L. Lam, F. Li, J. Li, Y.-L. Li, Y. Li, X. Liu, M. Lo, K. E. Lopez, A. A. Melo, F. R. Moss 3rd, P. Nguyen, J. Paulino, K. I. Pawar, J. K. Peters, T. H. Pospiech Jr., M. Safari, S. Sangwan, K. Schaefer, P. V. Thomas, A. C. Thwin, R. Trenker, E. Tse, T. K. M. Tsui, F. Wang, N. Whitis, Z. Yu, K. Zhang, Y. Zhang, F. Zhou, D. Saltzberg, A. J. Hodder, A. S. Shun-Shion, D. M. Williams, K. M. White, R. Rosales, T. Kehrer, L. Miorin, E. Moreno, A. H. Patel, S. Rihn, M. M. Khalid, A. Vallejo-Gracia, P. Fozouni, C. R. Simoneau, T. L. Roth, D. Wu, M. A. Karim, M. Ghousaini, I. Dunham, F. Berardi, S. Weigang, M. Chazal, J. Park, J. Logue, M. McGrath, S. Weston, R. Haupt, C. J. Hastie, M. Elliott, F. Brown, K. A. Burness, E. Reid, M. Dorward, C. Johnson, S. G. Wilkinson, A. Geyer, D. M. Giesel, C. Baillie, S. Raggett, H. Leech, R. Toth, N. Goodman, K. C. Keough, A. L. Lind, R. J. Klesh, K. R. Hemphill, J. Carlson-Stevermer, J. Oki, K. Holden, T. Maures, K. S. Pollard, A. Sali, D. A. Agard, Y. Cheng, J. S. Fraser, A. Frost, N. Jura, T. Kortemme, A. Manglik, D. R. Southworth, R. M. Stroud, D. R. Alessi, P. Davies, M. B. Frieman, T. Ideker, C. Abate, N. Jouvenet, G. Kochs, B. Shoichet, M. Ott, M. Palmarini, K. M. Shokat, A. García-Sastre, J. A. Rassen, R. Grosse, O. S. Rosenberg, K. A. Verba, C. F. Basler, M. Vignuzzi, A. A. Peden, P. Beltrao, N. J. Krogan; QCRG Structural Biology Consortium; Zoonomia Consortium, Comparative host-coronavirus protein interaction networks reveal pan-viral disease mechanisms. *Science* **370**, eabe9403 (2020). [doi:10.1126/science.abe9403](https://doi.org/10.1126/science.abe9403)  
[Medline](#)
26. J. Y. Li, C.-H. Liao, Q. Wang, Y.-J. Tan, R. Luo, Y. Qiu, X.-Y. Ge, The ORF6, ORF8 and nucleocapsid proteins of SARS-CoV-2 inhibit type I interferon signaling pathway. *Virus Res.* **286**, 198074 (2020). [doi:10.1016/j.virusres.2020.198074](https://doi.org/10.1016/j.virusres.2020.198074) [Medline](#)
27. Y. C. F. Su, D. E. Anderson, B. E. Young, M. Linster, F. Zhu, J. Jayakumar, Y. Zhuang, S. Kalimuddin, J. G. H. Low, C. W. Tan, W. N. Chia, T. M. Mak, S. Octavia, J. M. Chavatte, R. T. C. Lee, S. Pada, S. Y. Tan, L. Sun, G. Z. Yan, S. Maurer-Stroh, I. H. Mendenhall, Y. S. Leo, D. C. Lye, L. F. Wang, G. J. D. Smith, Discovery and Genomic Characterization of a 382-Nucleotide Deletion in ORF7b and ORF8 during the Early Evolution of SARS-CoV-2. *mBio* **11**, e01610-20 (2020). [10.1128/mBio.01610-20](https://doi.org/10.1128/mBio.01610-20)  
[Medline](#)
28. B. E. Young, S.-W. Fong, Y.-H. Chan, T.-M. Mak, L. W. Ang, D. E. Anderson, C. Y.-P. Lee, S. N. Amrun, B. Lee, Y. S. Goh, Y. C. F. Su, W. E. Wei, S. Kalimuddin, L. Y. A. Chai, S. Pada, S. Y. Tan, L. Sun, P. Parthasarathy, Y. Y. C. Chen, T. Barkham, R. T. P. Lin, S.



- Maurer-Stroh, Y.-S. Leo, L.-F. Wang, L. Renia, V. J. Lee, G. J. D. Smith, D. C. Lye, L. F. P. Ng, Effects of a major deletion in the SARS-CoV-2 genome on the severity of infection and the inflammatory response: An observational cohort study. *Lancet* **396**, 603–611 (2020). [doi:10.1016/S0140-6736\(20\)31757-8](https://doi.org/10.1016/S0140-6736(20)31757-8) [Medline](#)
29. T. P. Sheahan, A. C. Sims, S. R. Leist, A. Schäfer, J. Won, A. J. Brown, S. A. Montgomery, A. Hogg, D. Babusis, M. O. Clarke, J. E. Spahn, L. Bauer, S. Sellers, D. Porter, J. Y. Feng, T. Cihlar, R. Jordan, M. R. Denison, R. S. Baric, Comparative therapeutic efficacy of remdesivir and combination lopinavir, ritonavir, and interferon beta against MERS-CoV. *Nat. Commun.* **11**, 222 (2020). [doi:10.1038/s41467-019-13940-6](https://doi.org/10.1038/s41467-019-13940-6) [Medline](#)
30. M. E. Schmidt, C. J. Knudson, S. M. Hartwig, L. L. Pewe, D. K. Meyerholz, R. A. Langlois, J. T. Harty, S. M. Varga, Memory CD8 T cells mediate severe immunopathology following respiratory syncytial virus infection. *PLoS Pathog.* **14**, e1006810 (2018). [doi:10.1371/journal.ppat.1006810](https://doi.org/10.1371/journal.ppat.1006810) [Medline](#)
31. M. Bolles, D. Deming, K. Long, S. Agnihothram, A. Whitmore, M. Ferris, W. Funkhouser, L. Gralinski, A. Totura, M. Heise, R. S. Baric, A double-inactivated severe acute respiratory syndrome coronavirus vaccine provides incomplete protection in mice and induces increased eosinophilic proinflammatory pulmonary response upon challenge. *J. Virol.* **85**, 12201–12215 (2011). [doi:10.1128/JVI.06048-11](https://doi.org/10.1128/JVI.06048-11) [Medline](#)
32. L. A. Jackson, E. J. Anderson, N. G. Roupael, P. C. Roberts, M. Makhene, R. N. Coler, M. P. McCullough, J. D. Chappell, M. R. Denison, L. J. Stevens, A. J. Pruijssers, A. McDermott, B. Flach, N. A. Doria-Rose, K. S. Corbett, K. M. Morabito, S. O’Dell, S. D. Schmidt, P. A. Swanson 2nd, M. Padilla, J. R. Mascola, K. M. Neuzil, H. Bennett, W. Sun, E. Peters, M. Makowski, J. Albert, K. Cross, W. Buchanan, R. Pikaart-Tautges, J. E. Ledgerwood, B. S. Graham, J. H. Beigel; mRNA-1273 Study Group, An mRNA Vaccine against SARS-CoV-2 - Preliminary Report. *N. Engl. J. Med.* **383**, 1920–1931 (2020). [doi:10.1056/NEJMoa2022483](https://doi.org/10.1056/NEJMoa2022483) [Medline](#)
33. E. E. Walsh, R. W. Frenck Jr., A. R. Falsey, N. Kitchin, J. Absalon, A. Gurtman, S. Lockhart, K. Neuzil, M. J. Mulligan, R. Bailey, K. A. Swanson, P. Li, K. Koury, W. Kalina, D. Cooper, C. Fontes-Garfias, P.-Y. Shi, Ö. Türeci, K. R. Tompkins, K. E. Lyke, V. Raabe, P. R. Dormitzer, K. U. Jansen, U. Şahin, W. C. Gruber, Safety and Immunogenicity of Two RNA-Based Covid-19 Vaccine Candidates. *N. Engl. J. Med.* **383**, 2439–2450 (2020). [doi:10.1056/NEJMoa2027906](https://doi.org/10.1056/NEJMoa2027906) [Medline](#)
34. L. R. Baden, H. M. El Sahly, B. Essink, K. Kotloff, S. Frey, R. Novak, D. Diemert, S. A. Spector, N. Roupael, C. B. Creech, J. McGettigan, S. Khetan, N. Segall, J. Solis, A. Brosz, C. Fierro, H. Schwartz, K. Neuzil, L. Corey, P. Gilbert, H. Janes, D. Follmann, M. Marovich, J. Mascola, L. Polakowski, J. Ledgerwood, B. S. Graham, H. Bennett, R. Pajon, C. Knightly, B. Leav, W. Deng, H. Zhou, S. Han, M. Ivarsson, J. Miller, T. Zaks; COVE Study Group, Efficacy and Safety of the mRNA-1273 SARS-CoV-2 Vaccine. *N. Engl. J. Med.* **384**, 403–416 (2021). [doi:10.1056/NEJMoa2035389](https://doi.org/10.1056/NEJMoa2035389) [Medline](#)
35. K. Wu, A. P. Werner, M. Koch, A. Choi, E. Narayanan, G. B. E. Stewart-Jones, T. Colpitts, H. Bennett, S. Boyoglu-Barnum, W. Shi, J. I. Moliva, N. J. Sullivan, B. S. Graham, A. Carfi, K. S. Corbett, R. A. Seder, D. K. Edwards, Serum Neutralizing Activity Elicited by

- mRNA-1273 Vaccine. *N. Engl. J. Med.* **384**, 1468–1470 (2021).  
[doi:10.1056/NEJMc2102179](https://doi.org/10.1056/NEJMc2102179) [Medline](#)
36. M. M. Sauer, M. A. Tortorici, Y.-J. Park, A. C. Walls, L. Homad, O. J. Acton, J. E. Bowen, C. Wang, X. Xiong, W. de van der Schueren, J. Quispe, B. G. Hoffstrom, B.-J. Bosch, A. T. McGuire, D. Veessler, Structural basis for broad coronavirus neutralization. *Nat. Struct. Mol. Biol.* **28**, 478–486 (2021). [doi:10.1038/s41594-021-00596-4](https://doi.org/10.1038/s41594-021-00596-4) [Medline](#)
37. A. A. Cohen, P. N. P. Gnanapragasam, Y. E. Lee, P. R. Hoffman, S. Ou, L. M. Kakutani, J. R. Keeffe, H.-J. Wu, M. Howarth, A. P. West, C. O. Barnes, M. C. Nussenzweig, P. J. Bjorkman, Mosaic nanoparticles elicit cross-reactive immune responses to zoonotic coronaviruses in mice. *Science* **371**, 735–741 (2021). [doi:10.1126/science.abf6840](https://doi.org/10.1126/science.abf6840) [Medline](#)
38. K. O. Saunders, E. Lee, R. Parks, D. R. Martinez, D. Li, H. Chen, R. J. Edwards, S. Gobeil, M. Barr, K. Mansouri, S. M. Alam, L. L. Sutherland, F. Cai, A. M. Sanzone, M. Berry, K. Manne, K. W. Bock, M. Minai, B. M. Nagata, A. B. Kapingidza, M. Azoitei, L. V. Tse, T. D. Scobey, R. L. Spreng, R. W. Rountree, C. T. DeMarco, T. N. Denny, C. W. Woods, E. W. Petzold, J. Tang, T. H. Oguin 3rd, G. D. Sempowski, M. Gagne, D. C. Douek, M. A. Tomai, C. B. Fox, R. Seder, K. Wiehe, D. Weissman, N. Pardi, H. Golding, S. Khurana, P. Acharya, H. Andersen, M. G. Lewis, I. N. Moore, D. C. Montefiori, R. S. Baric, B. F. Haynes, Neutralizing antibody vaccine for pandemic and pre-emergent coronaviruses. *Nature* (2021). [doi:10.1038/s41586-021-03594-0](https://doi.org/10.1038/s41586-021-03594-0) [Medline](#)
39. L. R. Banner, J. G. Keck, M. M. Lai, A clustering of RNA recombination sites adjacent to a hypervariable region of the peplomer gene of murine coronavirus. *Virology* **175**, 548–555 (1990). [doi:10.1016/0042-6822\(90\)90439-X](https://doi.org/10.1016/0042-6822(90)90439-X) [Medline](#)
40. J. G. Keck, L. H. Soe, S. Makino, S. A. Stohlman, M. M. Lai, RNA recombination of murine coronaviruses: Recombination between fusion-positive mouse hepatitis virus A59 and fusion-negative mouse hepatitis virus 2. *J. Virol.* **62**, 1989–1998 (1988).  
[doi:10.1128/jvi.62.6.1989-1998.1988](https://doi.org/10.1128/jvi.62.6.1989-1998.1988) [Medline](#)
41. A. W. Freyn, J. Ramos da Silva, V. C. Rosado, C. M. Bliss, M. Pine, B. L. Mui, Y. K. Tam, T. D. Madden, L. C. de Souza Ferreira, D. Weissman, F. Krammer, L. Coughlan, P. Palese, N. Pardi, R. Nachbagauer, A Multi-Targeting, Nucleoside-Modified mRNA Influenza Virus Vaccine Provides Broad Protection in Mice. *Mol. Ther.* **28**, 1569–1584 (2020). [doi:10.1016/j.ymthe.2020.04.018](https://doi.org/10.1016/j.ymthe.2020.04.018) [Medline](#)
42. S. R. Leist, K. H. Dinnon 3rd, A. Schäfer, L. V. Tse, K. Okuda, Y. J. Hou, A. West, C. E. Edwards, W. Sanders, E. J. Fritch, K. L. Gully, T. Scobey, A. J. Brown, T. P. Sheahan, N. J. Moorman, R. C. Boucher, L. E. Gralinski, S. A. Montgomery, R. S. Baric, A Mouse-Adapted SARS-CoV-2 Induces Acute Lung Injury and Mortality in Standard Laboratory Mice. *Cell* **183**, 1070–1085.e12 (2020). [doi:10.1016/j.cell.2020.09.050](https://doi.org/10.1016/j.cell.2020.09.050) [Medline](#)
43. A. Roberts, D. Deming, C. D. Paddock, A. Cheng, B. Yount, L. Vogel, B. D. Herman, T. Sheahan, M. Heise, G. L. Genrich, S. R. Zaki, R. Baric, K. Subbarao, A mouse-adapted SARS-coronavirus causes disease and mortality in BALB/c mice. *PLOS Pathog.* **3**, e5 (2007). [doi:10.1371/journal.ppat.0030005](https://doi.org/10.1371/journal.ppat.0030005) [Medline](#)
